# Supplementary material for: The Joint Associations of Pulmonary Function and Relative Grip Strength with Metabolic Syndrome in Lung-Healthy Older Adults: A Cross-Sectional Study
Source: Research Square preprint supplement (doi:10.21203/rs.3.rs-7208912/v1), 2025-08-12
Supplement: Supplementary file 1 [file a254061a2ee1922c2372e725.pdf]

## Supplemental material file

**eTable 1.** Participant characteristics by cases and non-cases of metabolic syndrome (MetS).

**eTable 2.** Odds ratios (95% confidence intervals) of prevalent metabolic syndrome (MetS) by quartiles of pulmonary function and relative grip strength.

**eTable 3.** Odds ratios (95% confidence intervals) of metabolic syndrome (MetS) by tertiles of pulmonary function (% predicted) and relative grip strength (lean mass).

**eFigure1.** The independent associations of pulmonary function with the individual components of metabolic syndrome

**eFigure2.** The independent associations of relative grip strength with the individual components of metabolic syndrome.

**eTable 1. Participant characteristics by cases and non-cases of metabolic syndrome (MetS).**

| <b>Characteristic</b>                                                 | <b>All</b>   | <b>MetS<sup>a</sup></b> | <b>No MetS</b> | <b>P-value</b>   |
|-----------------------------------------------------------------------|--------------|-------------------------|----------------|------------------|
| N (%)                                                                 | 353 (100)    | 115 (32.6)              | 238 (67.4)     |                  |
| Age, years (SD)                                                       | 72.8 (5.7)   | 73.5 (5.3)              | 72.4 (5.9)     | 0.099            |
| Female, n (%)                                                         | 223 (63.2)   | 65 (56.5)               | 158 (66.4)     | 0.072            |
| Smoking status, n (%)                                                 |              |                         |                |                  |
| <i>Never</i>                                                          | 270 (76.5)   | 87 (75.7)               | 183 (76.9)     |                  |
| <i>Former</i>                                                         | 81 (23.0)    | 28 (24.4)               | 53 (22.3)      | 0.569            |
| <i>Current</i>                                                        | 2 (0.6)      | 0                       | 2 (0.8)        |                  |
| Heavy alcohol consumption <sup>b</sup> , n (%)                        | 27 (7.7)     | 12 (10.4)               | 15 (6.3)       | 0.171            |
| 400m walk time <sup>c</sup> , mins (SD)                               | 4.4 (0.8)    | 4.7 (0.9)               | 4.3 (0.7)      | <b>&lt;0.001</b> |
| Forced expiratory volume in 1 second (FEV <sub>1</sub> ), liters (SD) | 2.4 (0.6)    | 2.4 (0.6)               | 2.4 (0.6)      | 0.892            |
| FEV <sub>1</sub> , percent predicted (SD)                             | 98.9 (12.5)  | 96.9 (11.5)             | 99.8 (12.9)    | <b>0.036</b>     |
| FEV <sub>1</sub> , Z-score <sup>d</sup> (SD)                          | -0.06 (0.75) | -0.18 (0.68)            | -0.002 (0.78)  | <b>0.037</b>     |
| Relative grip strength, kgf/kg (SD)                                   | 0.40 (0.11)  | 0.36 (0.10)             | 0.42 (0.10)    | <b>&lt;0.001</b> |
| Waist circumference, cm (SD)                                          | 92.5 (13.4)  | 103.4 (11.3)            | 87.3 (10.9)    | <b>&lt;0.001</b> |
| Systolic blood pressure, mmHg (SD)                                    | 124.8 (16.9) | 128.7 (15.5)            | 122.9 (17.2)   | <b>0.002</b>     |
| Diastolic blood pressure, mmHg (SD)                                   | 71.7 (10.1)  | 73.6 (9.6)              | 70 (10.2)      | <b>0.014</b>     |
| Blood glucose, mg/dL (SD)                                             | 98.1 (17.7)  | 107.7 (22.8)            | 93.5 (12.1)    | <b>&lt;0.001</b> |
| Triglycerides, mg/dL (SD)                                             | 110.4 (65.3) | 148.6 (91.6)            | 92.0 (35.4)    | <b>&lt;0.001</b> |
| High-density lipoprotein cholesterol (HDL-C), mg/dL (SD)              | 60.6 (15.7)  | 51.9 (13.5)             | 64.8 (14.9)    | <b>&lt;0.001</b> |
| Elevated waist circumference, n (%)                                   | 158 (44.8)   | 101 (87.8)              | 57 (24.0)      | <b>&lt;0.001</b> |
| Elevated blood pressure, n (%)                                        | 177 (50.1)   | 92 (80.0)               | 85 (35.7)      | <b>&lt;0.001</b> |
| Elevated blood glucose, n (%)                                         | 109 (30.9)   | 75 (65.2)               | 34 (14.3)      | <b>&lt;0.001</b> |
| Elevated triglycerides, n (%)                                         | 166 (47.0)   | 97 (84.4)               | 69 (29.0)      | <b>&lt;0.001</b> |
| Low HDL-C, n (%)                                                      | 39 (11.1)    | 36 (31.3)               | 3 (1.3)        | <b>&lt;0.001</b> |
| No. of MetS components, n (%)                                         |              |                         |                |                  |
| 0                                                                     | 67 (19.0)    | 0                       | 67 (28.2)      |                  |
| 1                                                                     | 94 (26.6)    | 0                       | 94 (39.5)      |                  |
| 2                                                                     | 77 (21.8)    | 0                       | 77 (32.4)      |                  |
| 3                                                                     | 70 (19.8)    | 70 (60.9)               | 0              | <b>&lt;0.001</b> |
| 4                                                                     | 34 (9.6)     | 34 (29.6)               | 0              |                  |
| 5                                                                     | 11 (3.1)     | 11 (9.6)                | 0              |                  |

<sup>a</sup>Characterized as having  $\geq 3$  of the following characteristics: elevated waist circumference (men:  $>102$ cm; women:  $>88$ cm); elevated blood pressure ( $\geq 130$ mmHg systolic blood pressure;  $\geq 85$ mmHg diastolic blood pressure; or drug treatment for hypertension); elevated blood glucose ( $\geq 100$ mg/dL; or drug treatment for elevated glucose); elevated triglycerides ( $\geq 150$ mg/dL; or drug treatment for elevated triglycerides); low high-density lipoprotein cholesterol [HDL-C] (men:  $<40$ mg/dL; women:  $<50$ mg/dL; or drug treatment for low HDL-C), as defined by the National Cholesterol Education Adult Treatment Panel III (NCEP-ATP III).

<sup>b</sup>Defined as  $>14$  or  $>7$  alcoholic drinks per week for men and women, respectively, as defined by the National Institute on Alcohol Abuse and Alcoholism (NIAAA). <sup>c</sup>A validated surrogate of cardiorespiratory fitness (CRF) in older adults (higher values suggest lower CRF).

<sup>d</sup>A standardized residual indicating the number of standard deviations a measurement falls from a population mean (lower z-scores indicate lower lung function). Both the American Thoracic Society (ATS) and the European Respiratory Society (ERS) recommend the use of z-scores in the interpretation of spirometry.)

**eTable 2. Odds ratios (95% confidence intervals) of prevalent metabolic syndrome (MetS) by quartiles of pulmonary function and relative grip strength.**

| Pulmonary function                                               |                           |                   |                             |                             |                             |
|------------------------------------------------------------------|---------------------------|-------------------|-----------------------------|-----------------------------|-----------------------------|
| Quartile<br>(Mean ± SD FEV <sub>1</sub><br>Z-score) <sup>a</sup> | Number of<br>participants | MetS<br>cases (%) | Model 1                     | Model 2                     | Model 3                     |
| <b>Upper</b><br>(0.92 ± 0.42)                                    | 88                        | 19 (21.36)        | 1.00 (reference)            | 1.00 (reference)            | 1.00 (reference)            |
| <b>Upper middle</b><br>(0.16 ± 0.12)                             | 89                        | 33 (37.1)         | <b>2.37 (1.20-4.66)</b>     | <b>2.25 (1.12-4.53)</b>     | 1.64 (0.79-3.39)            |
| <b>Lower middle</b><br>(-0.33 ± 0.16)                            | 88                        | 32 (36.4)         | <b>2.16 (1.10-4.25)</b>     | <b>2.17 (1.08-4.36)</b>     | 1.81 (0.88-3.74)            |
| <b>Lower</b><br>(-1.00 ± 0.27)                                   | 88                        | 31 (35.2)         | <b>2.12 (1.08-4.19)</b>     | <b>2.07 (1.02-4.21)</b>     | 1.60 (0.76-3.37)            |
| <i>P</i> for linear trend                                        |                           |                   | 0.057                       | 0.073                       | 0.228                       |
| Per SD decrease in FEV <sub>1</sub> Z-score                      |                           |                   | <b>1.30<br/>(1.04-1.64)</b> | <b>1.30<br/>(1.02-1.66)</b> | 1.21<br>(0.93-1.57)         |
| Relative grip strength                                           |                           |                   |                             |                             |                             |
| Quartile<br>(Mean ± SD<br>kg/kg of body<br>mass)                 | Number of<br>participants | MetS<br>cases (%) | Model 1                     | Model 2                     | Model 3                     |
| <b>Upper</b><br>(0.52 ± 0.07)                                    | 88                        | 10 (11.4)         | 1.00 (reference)            | 1.00 (reference)            | 1.00 (reference)            |
| <b>Upper middle</b><br>(0.43 ± 0.06)                             | 89                        | 21 (23.6)         | <b>2.44 (1.07-5.55)</b>     | <b>2.38 (1.04-5.45)</b>     | <b>2.47 (1.08-5.67)</b>     |
| <b>Lower middle</b><br>(0.37 ± 0.06)                             | 89                        | 33 (37.1)         | <b>4.74 (2.14-10.50)</b>    | <b>4.31 (1.92-9.70)</b>     | <b>4.05 (1.79-9.15)</b>     |
| <b>Lower</b><br>(0.28 ± 0.06)                                    | 87                        | 51 (58.6)         | <b>11.91 (5.26-27.00)</b>   | <b>10.06 (4.24-23.86)</b>   | <b>9.71 (4.08-23.11)</b>    |
| <i>P</i> for linear trend                                        |                           |                   | <b>&lt;0.001</b>            | <b>&lt;0.001</b>            | <b>&lt;0.001</b>            |
| Per SD decrease in relative grip strength                        |                           |                   | <b>2.77<br/>(1.99-3.85)</b> | <b>2.52<br/>(1.77-3.58)</b> | <b>2.45<br/>(1.72-3.49)</b> |

**Abbreviations:** FEV<sub>1</sub>, Forced Expiratory Volume in 1 second; SD, standard deviation.

<sup>a</sup>Z-scores are a standardized metric that compares measurements of lung function to a healthy, non-smoking reference population (the reference population used for this analysis was the Global Lung Function Initiative [GLI]). A Z-Score of 0 equates to the mean value of the reference population (i.e., average pulmonary function), with more negative Z-scores reflecting lower lung function. **Model 1** adjusted for age (years) and sex (male or female); **Model 2** adjusted for Model 1 plus smoking status (never, former/current), heavy alcohol consumption (yes/no), and cardiorespiratory fitness (400m walk time); **Model 3** adjusted for Model 2 plus relative grip strength (kg/kg of body mass) in the pulmonary function analysis, and pulmonary function (FEV<sub>1</sub> Z-score) in the relative grip strength analysis.

**eTable 3. Odds ratios (95% confidence intervals) of metabolic syndrome (MetS) by tertiles of pulmonary function (% predicted) and relative grip strength (lean mass).**

| Pulmonary function                                                      |                           |                   |                         |                         |                         |
|-------------------------------------------------------------------------|---------------------------|-------------------|-------------------------|-------------------------|-------------------------|
| Tertile<br>(Mean $\pm$ SD FEV <sub>1</sub> %<br>predicted) <sup>a</sup> | Number of<br>participants | MetS<br>cases (%) | Model 1                 | Model 2                 | Model 3                 |
| <b>Upper</b><br>(112.51 $\pm$ 7.56 )                                    | 118                       | 29 (24.6)         | 1.00 (reference)        | 1.00 (reference)        | 1.00 (reference)        |
| <b>Middle</b><br>(98.77 $\pm$ 3.10)                                     | 118                       | 41 (34.8)         | 1.61 (0.91-2.86)        | 1.77 (0.97-3.22)        | 1.58 (0.85-2.95)        |
| <b>Lower</b><br>(85.19 $\pm$ 5.65)                                      | 117                       | 45 (38.5)         | <b>1.93 (1.09-3.41)</b> | <b>1.95 (1.07-3.54)</b> | 1.64 (0.88-3.05)        |
| <i>P</i> for linear trend                                               |                           |                   | <b>0.025</b>            | 0.032                   | 0.129                   |
| Per SD decrease in FEV <sub>1</sub> % predicted                         |                           |                   | <b>1.28 (1.02-1.62)</b> | 1.27 (0.995-1.624)      | 1.19 (0.92-1.55)        |
| Relative grip strength                                                  |                           |                   |                         |                         |                         |
| Tertile<br>(Mean $\pm$ SD kg/kg of<br>lean mass) <sup>b</sup>           | Number of<br>participants | MetS<br>cases (%) | Model 1                 | Model 2                 | Model 3                 |
| <b>Upper</b><br>(0.79 $\pm$ 0.08)                                       | 115                       | 23 (20.0)         | 1.00 (reference)        | 1.00 (reference)        | 1.00 (reference)        |
| <b>Upper middle</b><br>(0.66 $\pm$ 0.05)                                | 115                       | 36 (31.3)         | 1.82 (0.99-3.34)        | 1.65 (0.89-3.05)        | 1.64 (0.88-3.04)        |
| <b>Lower middle</b><br>(0.51 $\pm$ 0.09)                                | 114                       | 53 (46.5)         | <b>3.45 (1.87-6.35)</b> | <b>2.61 (1.36-4.99)</b> | <b>2.45 (1.27-4.72)</b> |
| <i>P</i> for linear trend                                               |                           |                   | <b>&lt;0.001</b>        | <b>0.004</b>            | <b>0.008</b>            |
| Per SD decrease in relative grip strength                               |                           |                   | <b>3.54 (2.31-5.44)</b> | <b>3.15 (2.00-4.97)</b> | <b>3.00 (1.90-4.75)</b> |

**Abbreviations:** FEV<sub>1</sub>, Forced Expiratory Volume in 1 second; SD, standard deviation.

<sup>a</sup>Z-scores are a standardized metric that compares measurements of lung function to a healthy, non-smoking reference population (the reference population used for this analysis was the Global Lung Function Initiative [GLI]). A value of 100% predicted means the observed lung function value is exactly the predicted value. <sup>b</sup>Lean mass was derived from whole-body Dual X-ray Absorptiometry (DEXA), with data available for a subset of the primary analytic sample (N = 344). **Model 1** adjusted for age (years) and sex (male or female); **Model 2** adjusted for Model 1 plus smoking status (never, former/current), heavy alcohol consumption (yes/no), and cardiorespiratory fitness (400m walk time); **Model 3** adjusted for Model 2 plus relative grip strength (kg/kg of body mass) in the pulmonary function analysis, and pulmonary function (FEV<sub>1</sub> Z-score) in the relative grip strength analysis.

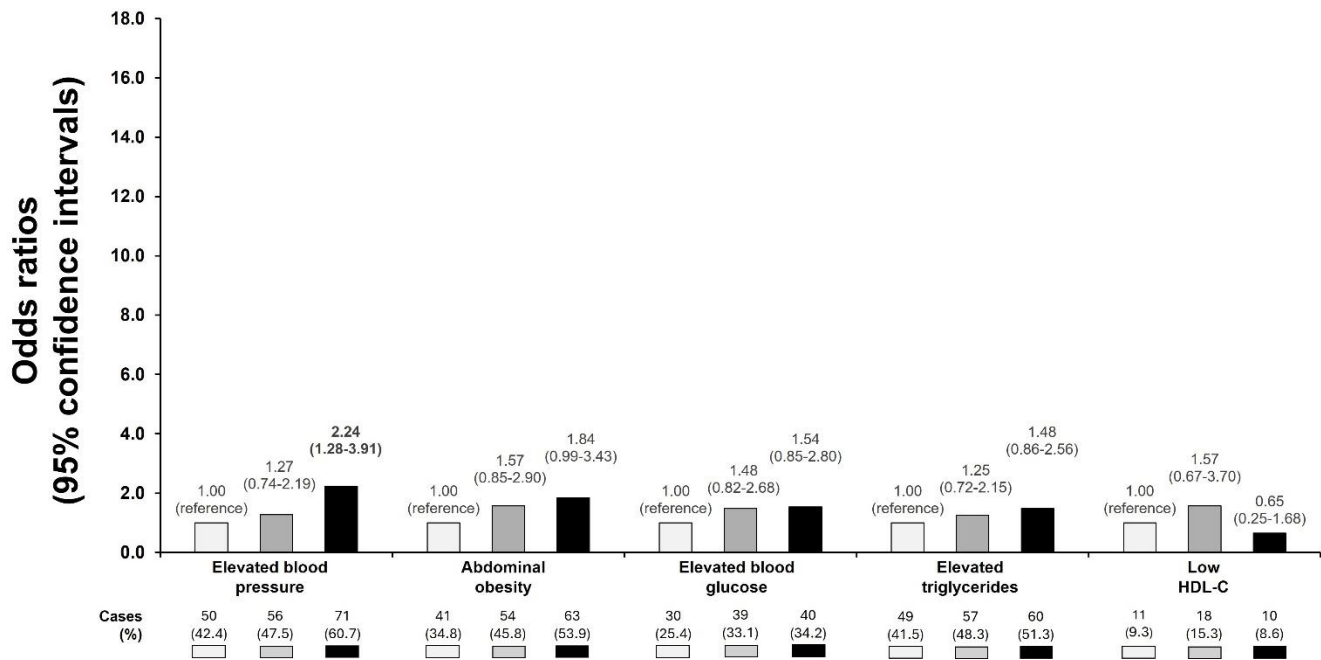

**eFigure 1. The independent associations of pulmonary function with the individual components of metabolic syndrome.**

The logistic regression model adjusted for age (years), sex (male or female), smoking status (never or former/current), heavy alcohol consumption (yes or no), cardiorespiratory fitness (400m walk time), and relative grip strength (kg/kg of body mass). Definitions for the individual components of metabolic syndrome were based on the National Cholesterol Education Adult Treatment Panel III (NCEP-ATP III) criteria. Elevated blood pressure was defined as  $\geq 130$ mmHg systolic blood pressure,  $\geq 85$ mmHg diastolic blood pressure, or drug treatment for hypertension. Abdominal obesity was defined as waist circumference  $>102$ cm or  $>88$ cm for men and women, respectively. Elevated blood glucose was defined as  $\geq 100$ mg/dL or drug treatment for elevated glucose. Elevated triglycerides was defined as  $\geq 150$ mg/dL or drug treatment for elevated triglycerides. Low high-density lipoprotein cholesterol [HDL-C] was defined as men:  $<40$ mg/dL or  $<50$ mg/dL for men and women, respectively.

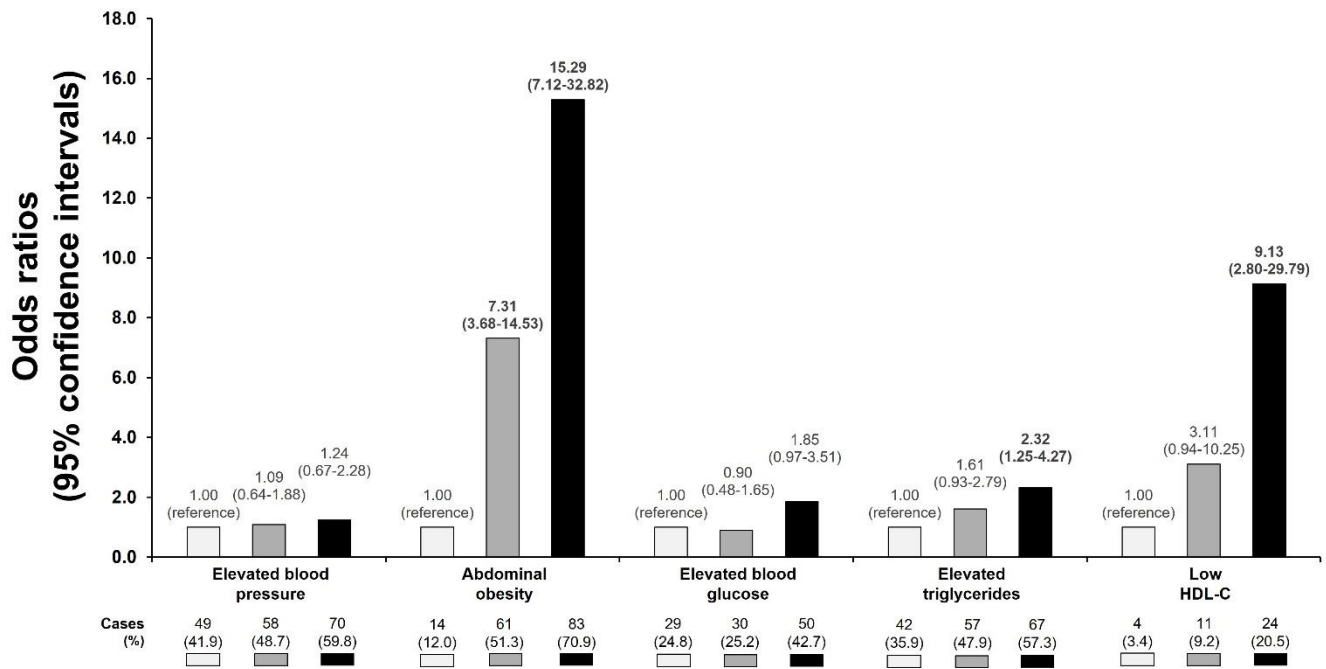

**Figure 2. The independent associations of relative grip strength with the individual components of metabolic syndrome.**

The logistic regression model adjusted for age (years), sex (male or female), smoking status (never or former/current), heavy alcohol consumption (yes or no), cardiorespiratory fitness (400m walk time), and pulmonary function (FEV<sub>1</sub> Z-score). Definitions for the individual components of metabolic syndrome were based on the National Cholesterol Education Adult Treatment Panel III (NCEP-ATP III) criteria. Elevated blood pressure was defined as  $\geq 130$ mmHg systolic blood pressure,  $\geq 85$ mmHg diastolic blood pressure, or drug treatment for hypertension. Abdominal obesity was defined as waist circumference  $> 102$ cm or  $> 88$ cm for men and women, respectively. Elevated blood glucose was defined as  $\geq 100$ mg/dL or drug treatment for elevated glucose. Elevated triglycerides was defined as  $\geq 150$ mg/dL or drug treatment for elevated triglycerides. Low high-density lipoprotein cholesterol [HDL-C] was defined as men:  $< 40$ mg/dL or  $< 50$ mg/dL for men and women, respectively.
